# Supplementary material for: Tin doped PrBaFe2O5+δ anode material for solid oxide fuel cells
Source: Royal Society of Chemistry journal article supplement (doi:10.1039/c7ra03143b), 2017-01-01
Supplement: c7ra03143b1.pdf [file c7ra03143b1.pdf]

Supporting Information

## Tin Doped PrBaFe<sub>2</sub>O<sub>5+δ</sub> Anode Material for Solid Oxide Fuel Cells

Guohui Dong, Chunyang Yang, Fei He, Yanmei Jiang, Chunlei Ren, Yun Gan, Myongjin Lee, and Xingjian Xue \*

Department of Mechanical Engineering, University of South Carolina, Columbia, SC 29208, USA

**Table S1.** Element molar ratios of as-prepared PrBaFe<sub>(2-x)</sub>Sn<sub>x</sub>O<sub>5+δ</sub> (x=0, 0.05, 0.1, 0.15, 0.2, 0.3) powders obtained from ICP–OES experiment and analysis.

| X value of Sn | Nominal compositions                                       | ICP-OES tested results                                                                       |       |       |       |
|---------------|------------------------------------------------------------|----------------------------------------------------------------------------------------------|-------|-------|-------|
|               |                                                            | Tested compositions                                                                          | Pr/Ba | Fe/Ba | Sn/Ba |
| 0             | PrBaFe <sub>2</sub> O <sub>5+δ</sub>                       | Pr <sub>0.97</sub> Ba <sub>0.99</sub> Fe <sub>2.00</sub> O <sub>5+δ</sub>                    | 0.98  | 2.02  | 0     |
| 0.05          | PrBaFe <sub>1.95</sub> Sn <sub>0.05</sub> O <sub>5+δ</sub> | Pr <sub>0.99</sub> Ba <sub>0.99</sub> Fe <sub>1.93</sub> Sn <sub>0.04</sub> O <sub>5+δ</sub> | 1.00  | 1.95  | 0.04  |
| 0.1           | PrBaFe <sub>1.9</sub> Sn <sub>0.1</sub> O <sub>5+δ</sub>   | Pr <sub>0.98</sub> Ba <sub>0.99</sub> Fe <sub>1.88</sub> Sn <sub>0.09</sub> O <sub>5+δ</sub> | 0.99  | 1.90  | 0.09  |
| 0.15          | PrBaFe <sub>1.85</sub> Sn <sub>0.15</sub> O <sub>5+δ</sub> | Pr <sub>0.99</sub> Ba <sub>1.01</sub> Fe <sub>1.86</sub> Sn <sub>0.15</sub> O <sub>5+δ</sub> | 0.98  | 1.84  | 0.15  |
| 0.2           | PrBaFe <sub>1.8</sub> Sn <sub>0.2</sub> O <sub>5+δ</sub>   | Pr <sub>0.98</sub> Ba <sub>0.98</sub> Fe <sub>1.77</sub> Sn <sub>0.20</sub> O <sub>5+δ</sub> | 1.00  | 1.81  | 0.20  |
| 0.3           | PrBaFe <sub>1.7</sub> Sn <sub>0.3</sub> O <sub>5+δ</sub>   | Pr <sub>0.99</sub> Ba <sub>1.01</sub> Fe <sub>1.74</sub> Sn <sub>0.29</sub> O <sub>5+δ</sub> | 0.98  | 1.72  | 0.29  |

**Table S2.** The oxygen content (5+δ) in the as-prepared PrBaFe<sub>(2-x)</sub>Sn<sub>x</sub>O<sub>5+δ</sub> (x=0, 0.05, 0.1, 0.15, 0.2, 0.3) and after reducing treatment in humidified gas mixture of 10 % H<sub>2</sub> + 90% N<sub>2</sub> at 800 °C for 24h.

| x value of Sn | Oxygen content (5+δ) |                |
|---------------|----------------------|----------------|
|               | As-prepared          | After reducing |
| 0             | 5.7688               | 5.5853         |
| 0.05          | 5.8211               | 5.5571         |
| 0.1           | 5.8216               | 5.496          |
| 0.15          | 5.8386               | 5.4417         |
| 0.2           | 5.7605               | 5.4305         |
| 0.3           | 5.7458               | 5.3571         |

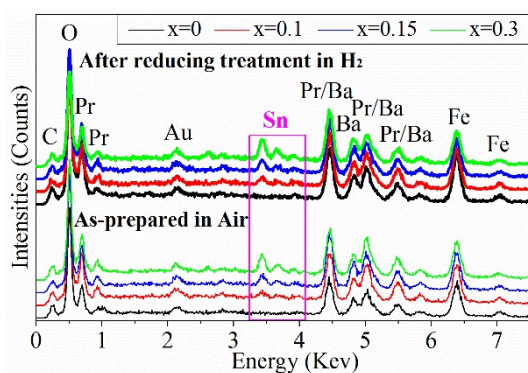

**Figure S1.** The EDS spectra of as-prepared  $\text{PrBaFe}_{(2-x)}\text{Sn}_x\text{O}_{5+\delta}$  ( $x=0, 0.1, 0.15, 0.3$ ) powders and after reducing treatment (humidified gas mixture of 10%  $\text{H}_2$  + 90%  $\text{N}_2$ ) at 800 °C for 24h.

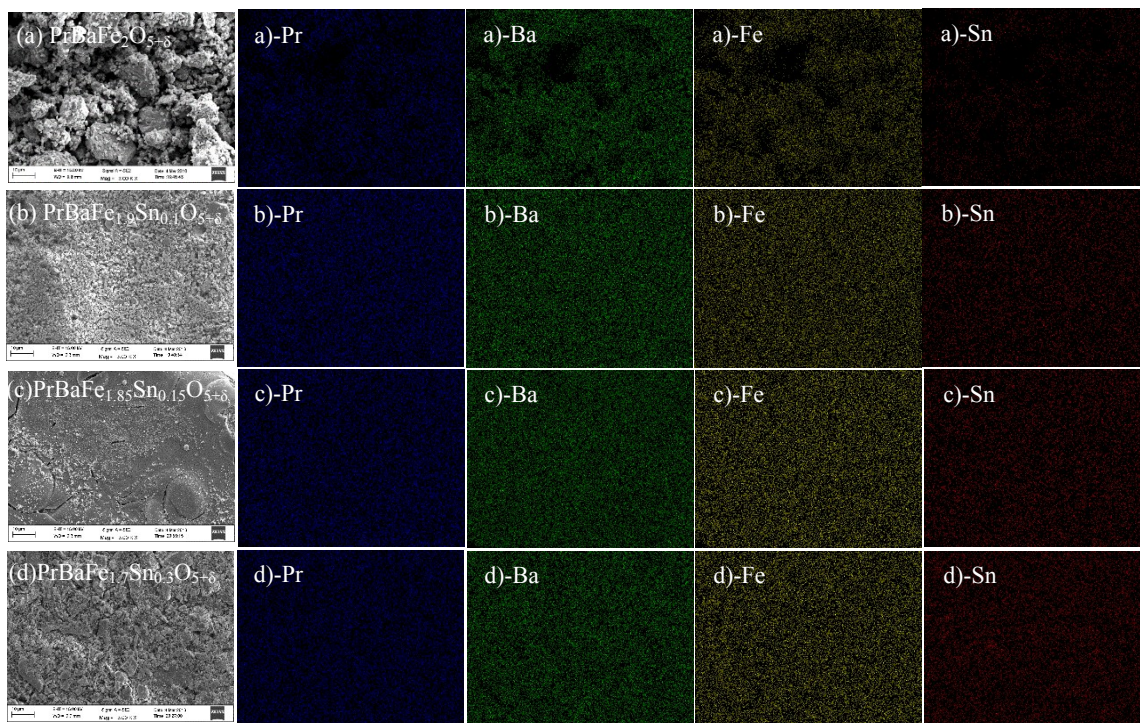

**Figure S2.** SEM images and EDS element mappings of as-prepared  $\text{PrBaFe}_{(2-x)}\text{Sn}_x\text{O}_{5+\delta}$  ( $x=0, 0.1, 0.15, 0.3$ ) powders. (a)  $x=0$ ; (b)  $x=0.1$ ; (c)  $x=0.15$ ; (d)  $x=0.3$ . The scale length in all SEM images is 10  $\mu\text{m}$ .

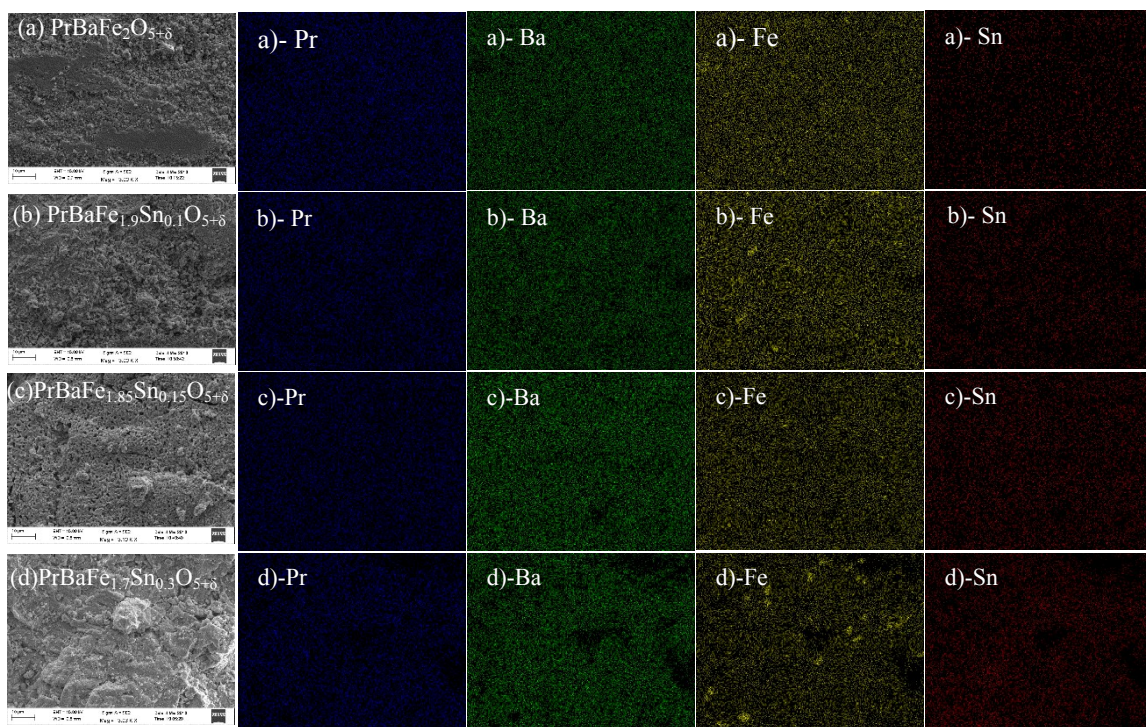

**Figure S3.** SEM images and EDS element mappings of  $\text{PrBaFe}_{(2-x)}\text{Sn}_x\text{O}_{5+\delta}$  ( $x=0, 0.1, 0.15, 0.3$ ) powders after reducing treatment at  $800\text{ }^\circ\text{C}$  for 24 h in the humidified gas mixture of  $10\% \text{H}_2 + 90\% \text{N}_2$ . (a)  $x=0$ ; (b)  $x=0.1$ ; (c)  $x=0.15$ ; (d)  $x=0.3$ . The scale length in all SEM images are  $10\text{ }\mu\text{m}$ .

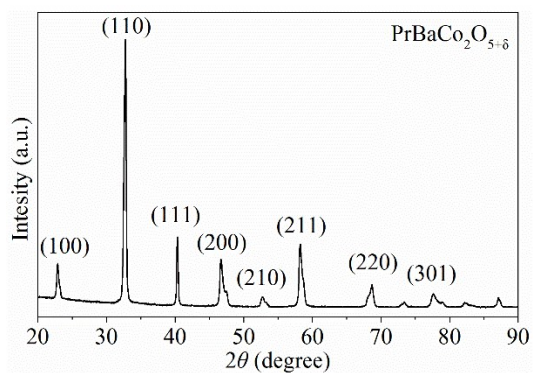

**Figure S4.** The XRD patterns of as-synthesized  $\text{PrBaCo}_2\text{O}_{5+\delta}$  powder samples calcinated at  $950\text{ }^\circ\text{C}$  in air for 5 h.

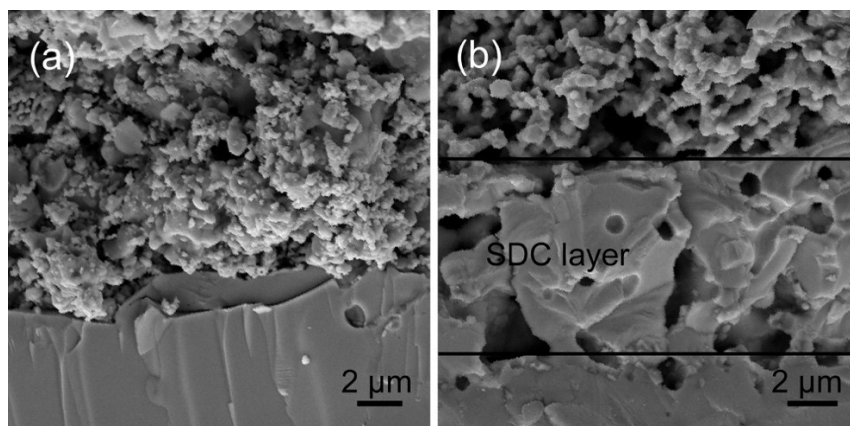

**Figure S5.** SEM micrographs of the single cell with configuration of  $\text{PrBaFe}_{1.9}\text{Sn}_{0.1}\text{O}_{5+\delta}$  | LSGM | SDC | PBCO after testing:  $\text{PrBaFe}_{1.9}\text{Sn}_{0.1}\text{O}_{5+\delta}$  anode (a) and SDC buffer layer and PBCO cathode (b).

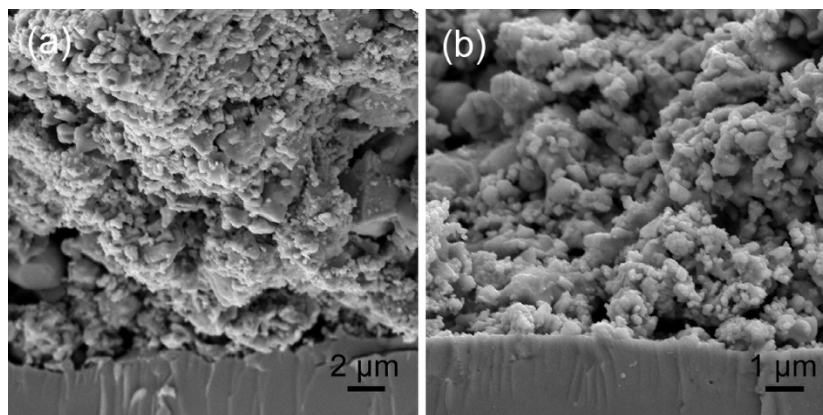

**Figure S6.** SEM micrographs of the symmetrical cell with configuration of  $\text{PrBaFe}_{1.9}\text{Sn}_{0.1}\text{O}_{5+\delta}$  | LSGM |  $\text{PrBaFe}_{1.9}\text{Sn}_{0.1}\text{O}_{5+\delta}$  after testing:  $\text{PrBaFe}_{1.9}\text{Sn}_{0.1}\text{O}_{5+\delta}$  anode (a) and  $\text{PrBaFe}_{1.9}\text{Sn}_{0.1}\text{O}_{5+\delta}$  cathode (a).
